# Supplementary material for: Monitoring the influence of wastewater effluent on a small drinking water system using EEM fluorescence spectroscopy coupled with a PARAFAC and PCA statistical approach
Source: Royal Society of Chemistry journal article supplement (doi:10.1039/d1em00015b), 2021-01-01
Supplement: d1em00015b1.pdf [file d1em00015b1.pdf]

**Monitoring the influence of wastewater effluent to a small drinking water system using EEM Fluorescence spectroscopy coupled with PARAFAC and PCA statistical approach**

Yuri Park<sup>1,2\*</sup>, Sean MacIsaac<sup>2</sup>, Parminder Kaur<sup>1</sup>, Michael Brophy<sup>2</sup> and Graham A. Gagnon<sup>2</sup>

<sup>1</sup>Department of Separation Science, School of Engineering Science, Mikkeli, LUT University

<sup>2</sup>Center of Water Resources Studies, Dalhousie University, Halifax, NS, Canada

\*Corresponding Author: Yuri Park ([yuri.park@lut.fi](mailto:yuri.park@lut.fi))

**Table S1.** Description of CP sites

| Site Identification         | Site Description                                                                                          |
|-----------------------------|-----------------------------------------------------------------------------------------------------------|
| <b>CP1</b>                  | Lake Thomas run, flowing into Fletchers Lake. Wide channel, fast flows and located around an urban area.  |
| <b>CP2</b>                  | Site below the lift station that pumps wastewater into the Lockview-MacPherson WWTP                       |
| <b>CP3</b>                  | Bottom of Holland Brook, located in a residential subdivision                                             |
| <b>CP4</b>                  | Top of Holland Brook, located in a heavily forested area with little development                          |
| <b>CP5</b>                  | Control area below Lizard Lake, located in a new subdivision that will be further developed in the future |
| <b>Drinking Water (DWR)</b> | Source water samples were taken at the Collins Park DWTP.                                                 |
| <b>Wastewater (WWT)</b>     | Treated wastewater samples were taken at the Lockview-MacPherson WWTP                                     |

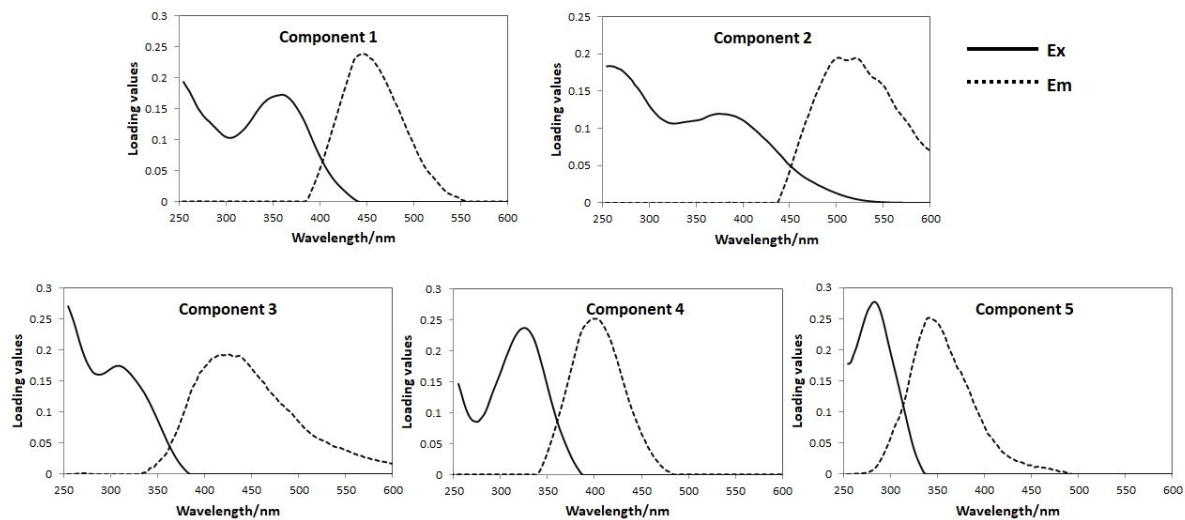

**Figure S1.** Contour plots of the five components produced from the EEM Fluorescence datasets (the excitation (ex; solid) and emission (em; dotted) loadings for the corresponding component)

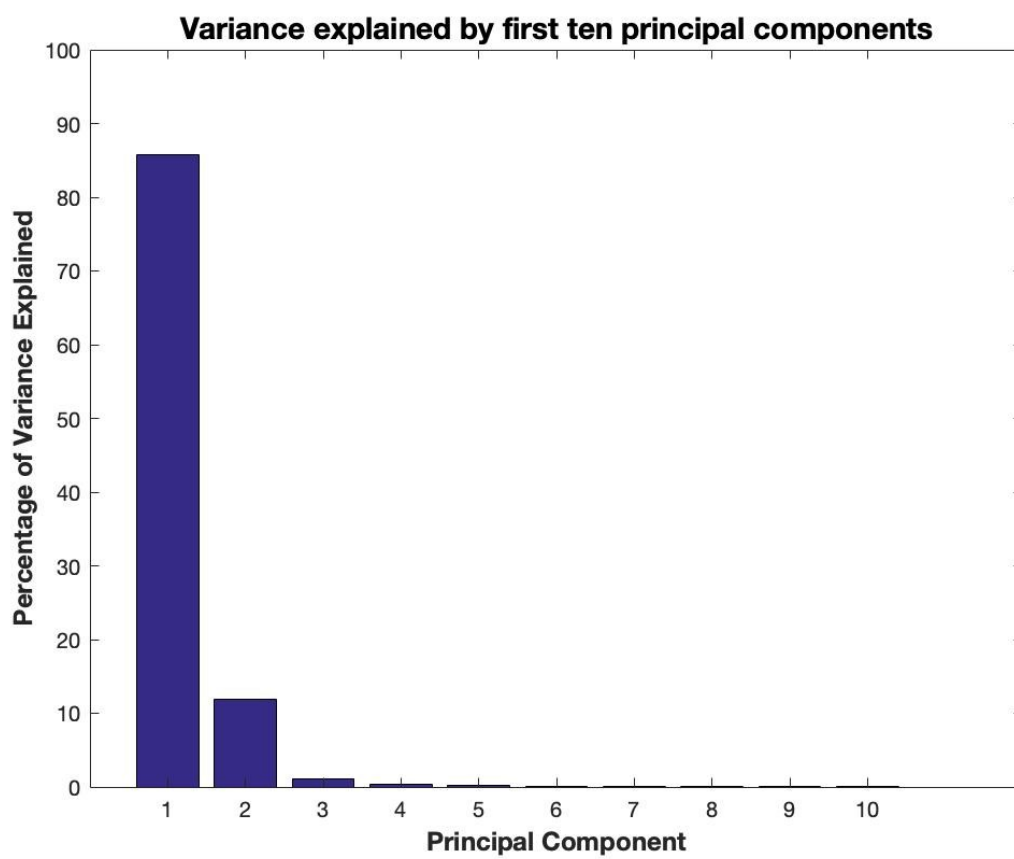

**Figure S2.** Variance explained by principal components

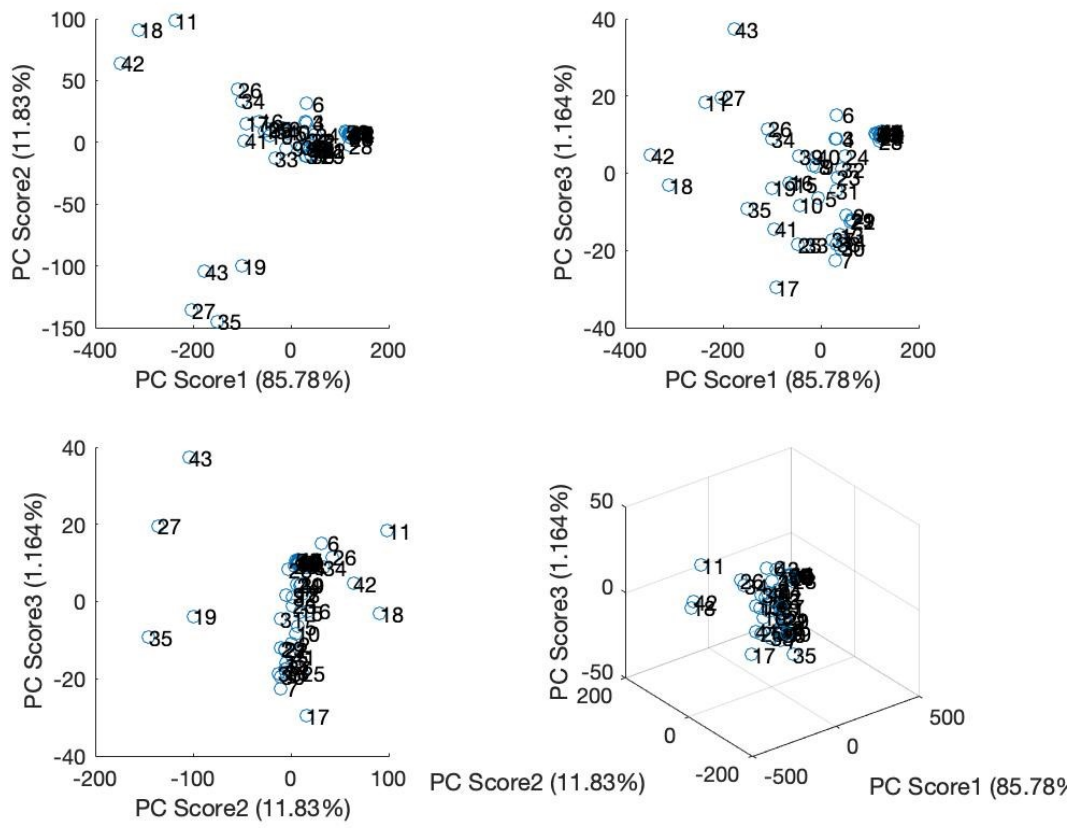

**Figure 3.** Score plots correlated with different PC components (e.g., PC1 vs. PC2, PC1 vs PC3, PC2 vs PC3, and, PC1 vs PC2 vs PC3)
